# Supplementary material for: Chemistry and human exposure implications of secondary organic aerosol production from indoor terpene ozonolysis
Source: PubMed Central journal article supplement — Sci Adv. 2022 Feb 25;8(8):eabj9156. doi: 10.1126/sciadv.abj9156 (PMC8880786; doi:10.1126/sciadv.abj9156), 2022-02-25
Supplement: sciadv.abj9156_sm.pdf [file sciadv.abj9156_sm.pdf]

Supplementary Materials for  
**Chemistry and human exposure implications of secondary organic aerosol  
production from indoor terpene ozonolysis**

Colleen Marciel F. Rosales, Jinglin Jiang, Ahmad Lahib, Brandon P. Bottorff, Emily K. Reidy,  
Vinay Kumar, Antonios Tasoglou, Heinz Huber, Sebastien Dusanter, Alexandre Tomas,  
Brandon E. Boor\*, Philip S. Stevens\*

\*Corresponding author. Email: [bboor@purdue.edu](mailto:bboor@purdue.edu) (B.E.B.); [pstevens@indiana.edu](mailto:pstevens@indiana.edu) (P.S.S.)

Published 25 February 2022, *Sci. Adv.* **8**, eabj9156 (2022)

DOI: [10.1126/sciadv.abj9156](https://doi.org/10.1126/sciadv.abj9156)

**This PDF file includes:**

Figs. S1 to S8  
Tables S1 and S2  
References

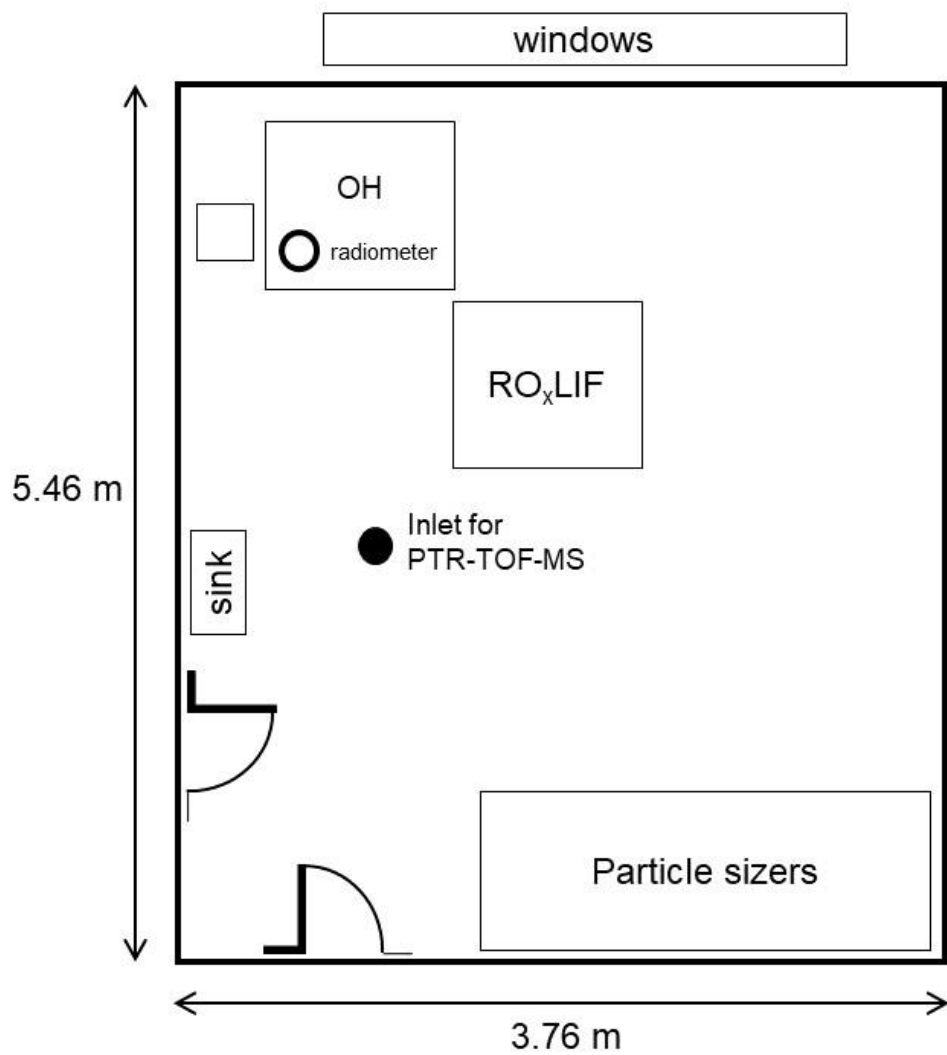

**Fig. S1. Test room layout.**

Spacing is approximate and instruments are not drawn to scale.

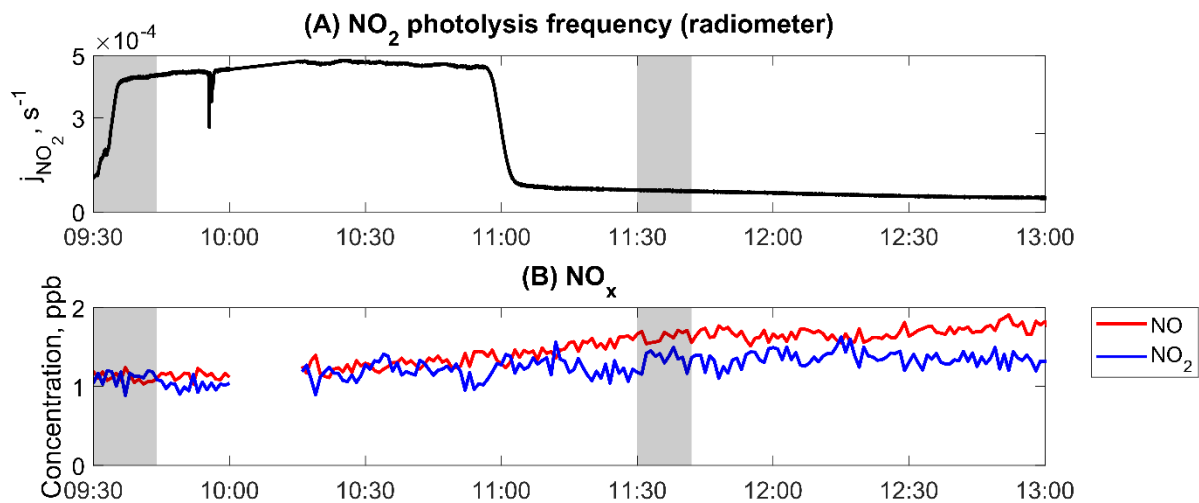

**Fig. S2. Time series of additional measurements.**

(A) Photolysis rate constant for NO<sub>2</sub> ( $J_{\text{NO}_2}$ ) (B) NO<sub>x</sub> (NO and NO<sub>2</sub>) concentrations.

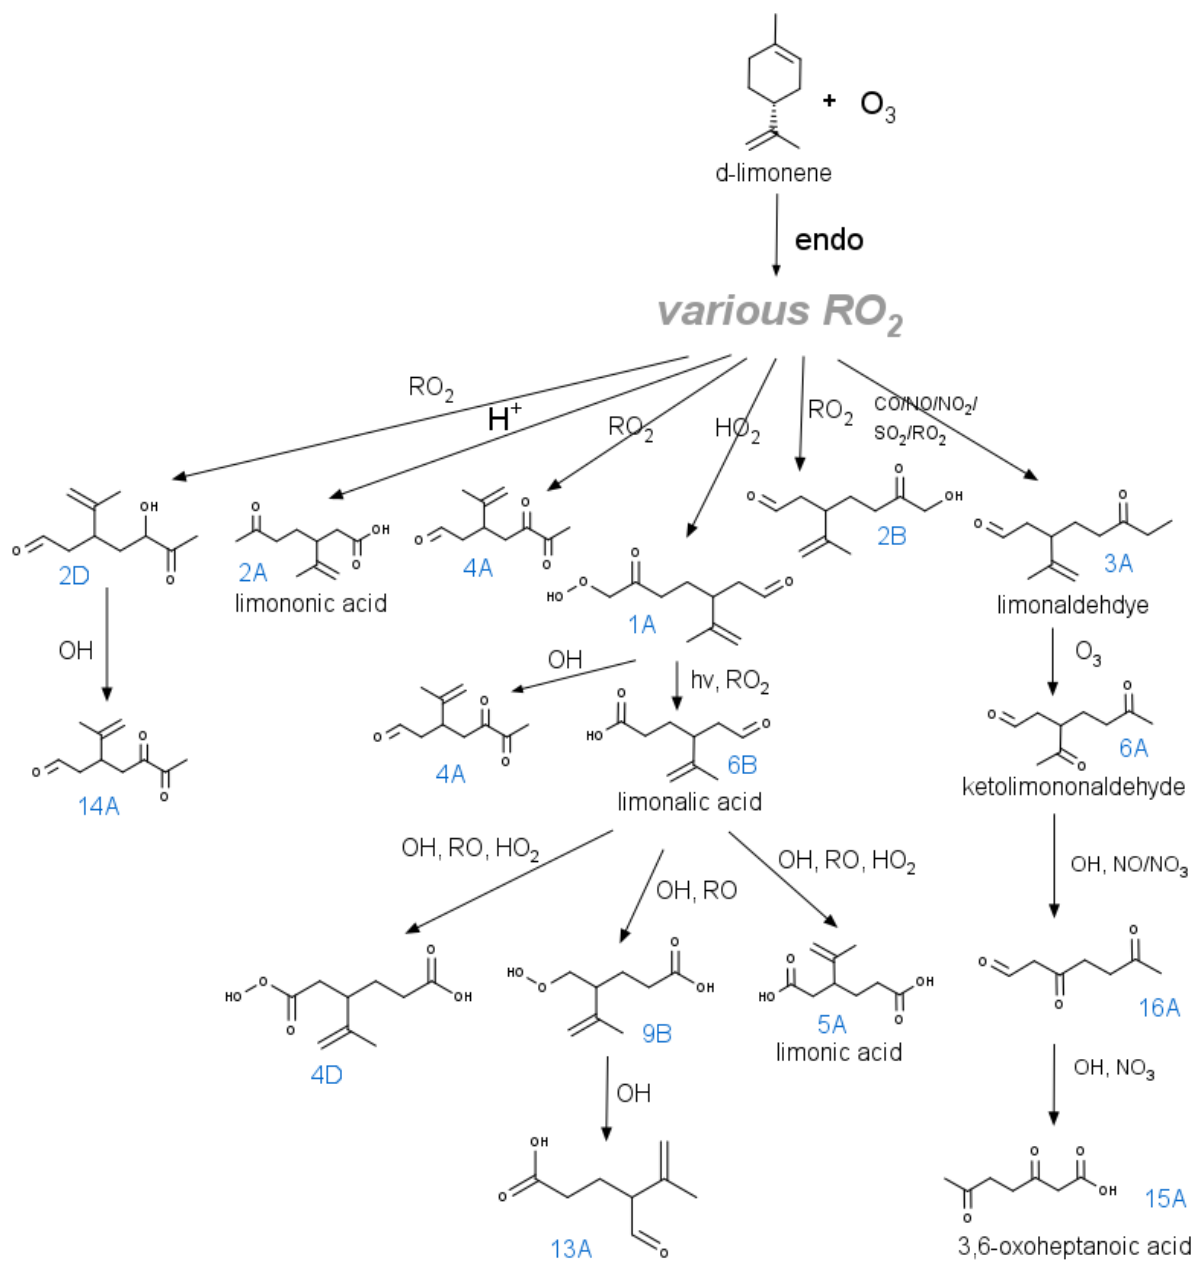

**Fig. S3. Chemical mechanism for d-limonene ozonolysis through the endocyclic double bond.**

The labels in blue correspond to entries in Table S2.

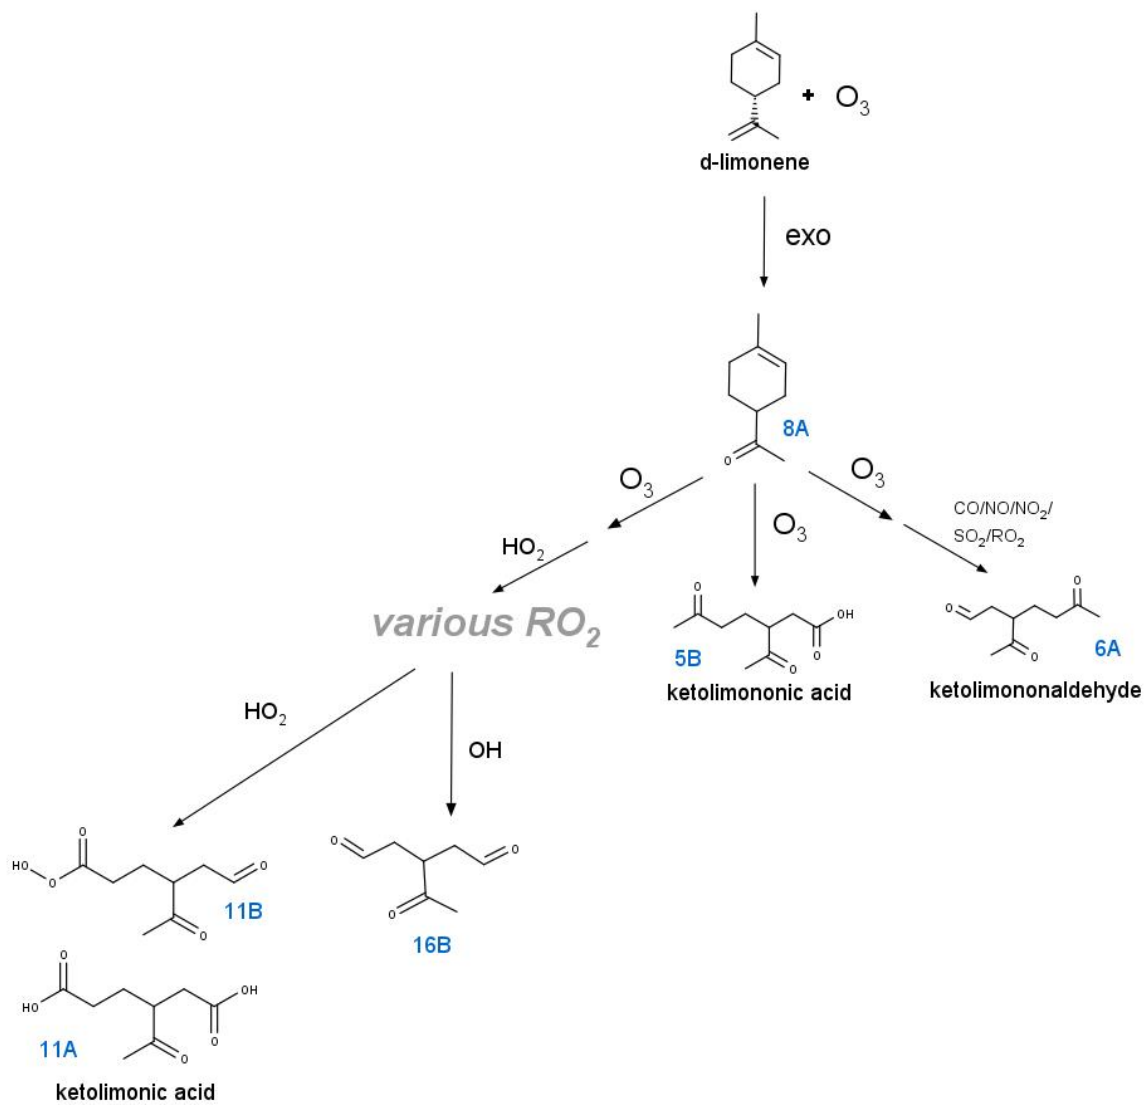

**Fig. S4. Chemical mechanism for d-limonene ozonolysis through the exocyclic double bond.**

The labels in blue correspond to entries in Table S2.

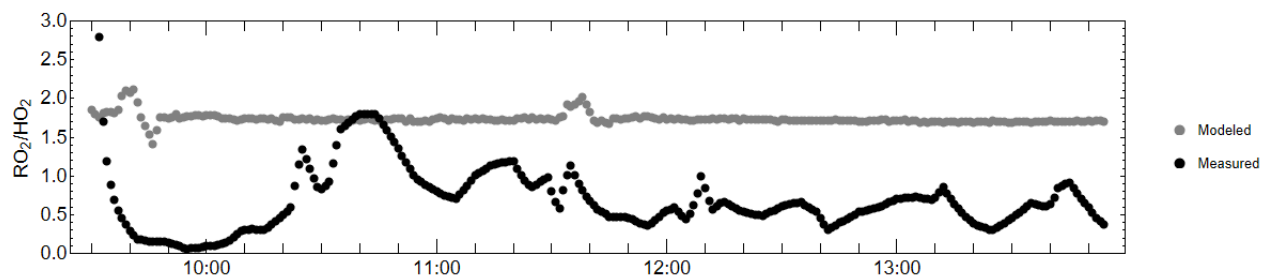

**Fig. S5. RO<sub>2</sub>-to-HO<sub>2</sub> ratios for measured and modeled RO<sub>2</sub> and HO<sub>2</sub>.**

Measured RO<sub>2</sub>-to-HO<sub>2</sub> ratios range from 0.06 to 1.80, while modeled RO<sub>2</sub>-to-HO<sub>2</sub> ratios range from 1.3 to 2.3. While the modeled ratios show that RO<sub>2</sub> is always greater than the modeled HO<sub>2</sub>, measured ratios show that at times, measured RO<sub>2</sub> concentrations are at times lower than the measured HO<sub>2</sub> concentrations.

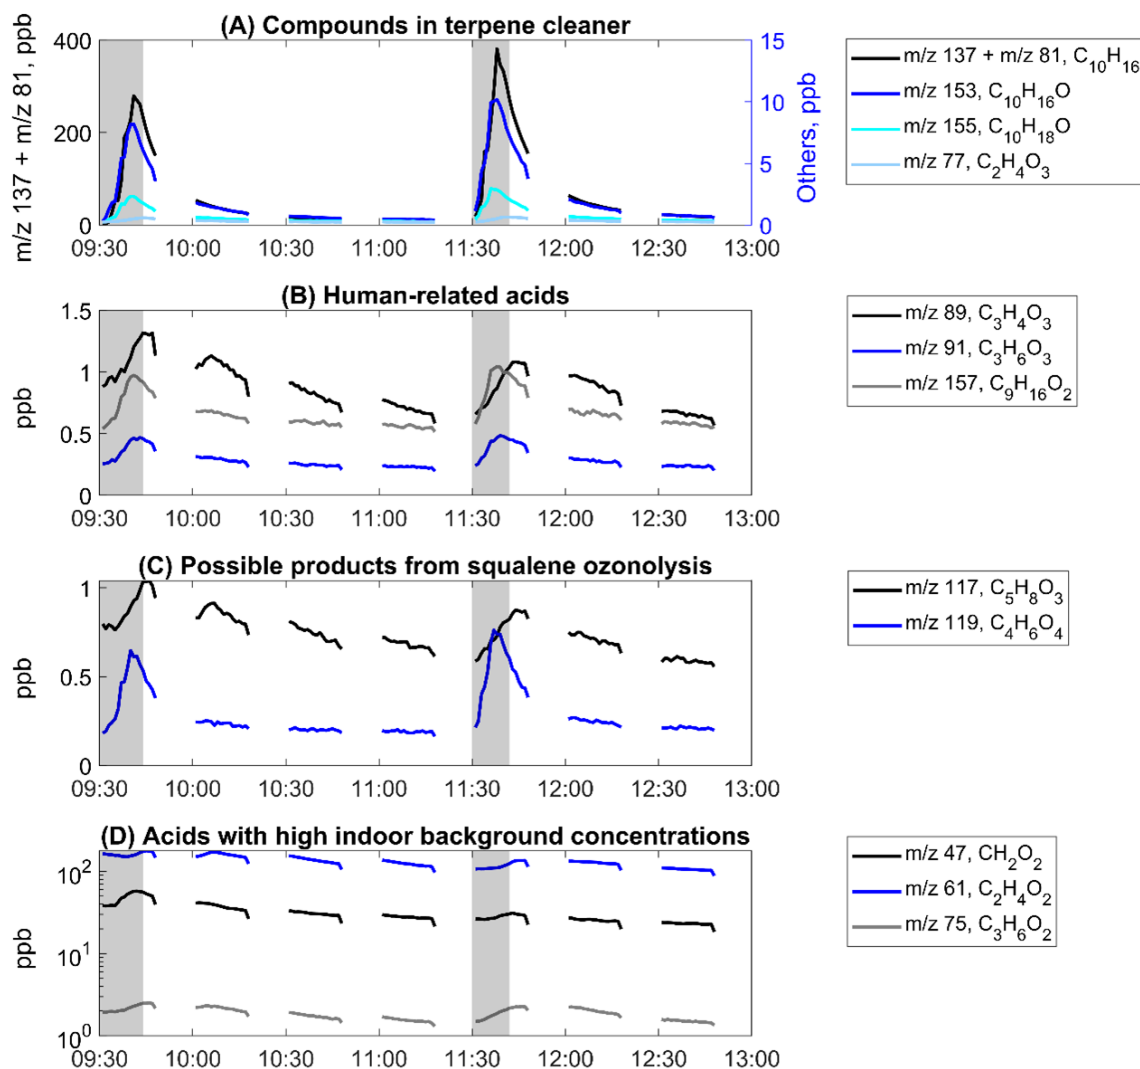

**Fig. S6. Other organic compounds detected by PTR-ToF-MS.**

(A) Primary emissions consumer cleaning product, (B) possible human body-associated emissions of organic acids, (C) products from squalene ozonolysis, and (D) acids with high indoor background concentrations. Gray shading corresponds to active periods of mopping and wiping during the cleaning events. Note: a researcher was present during the mopping and cleaning periods.

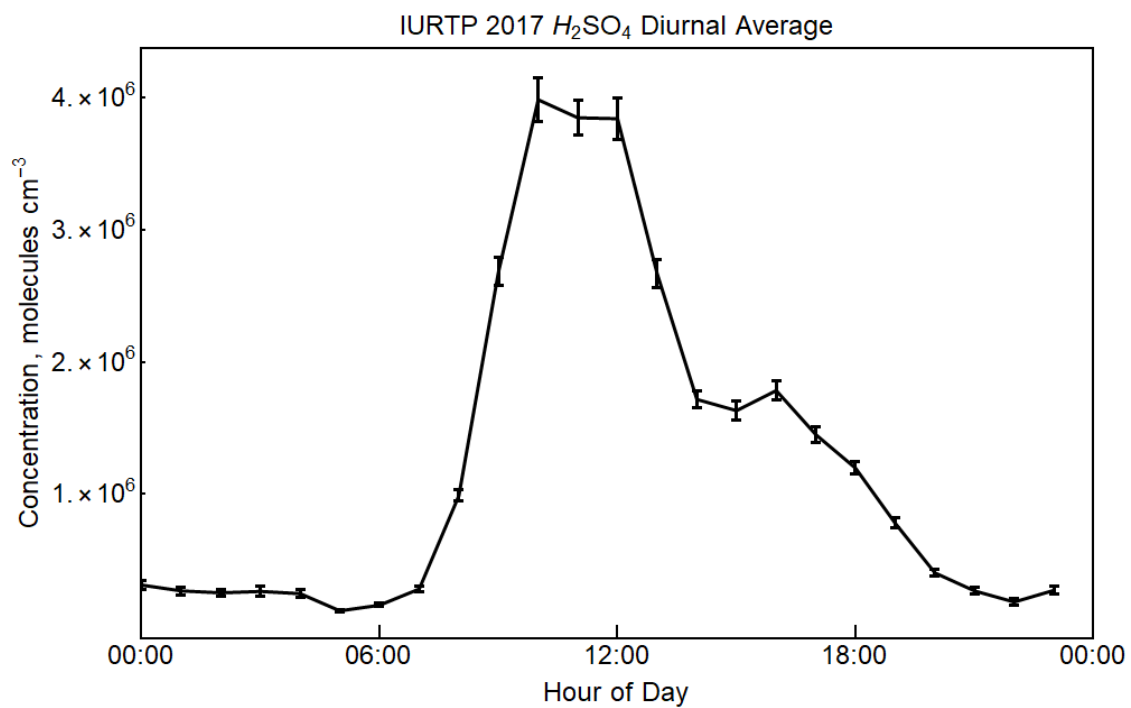

**Fig. S7. Diurnal average of ambient  $H_2SO_4$  concentrations at the IURTP field site in 2017.**

Gas-phase ambient  $H_2SO_4$  was measured with a Chemical Ionization Mass Spectrometer (CIMS) by the University of Colorado–Boulder.



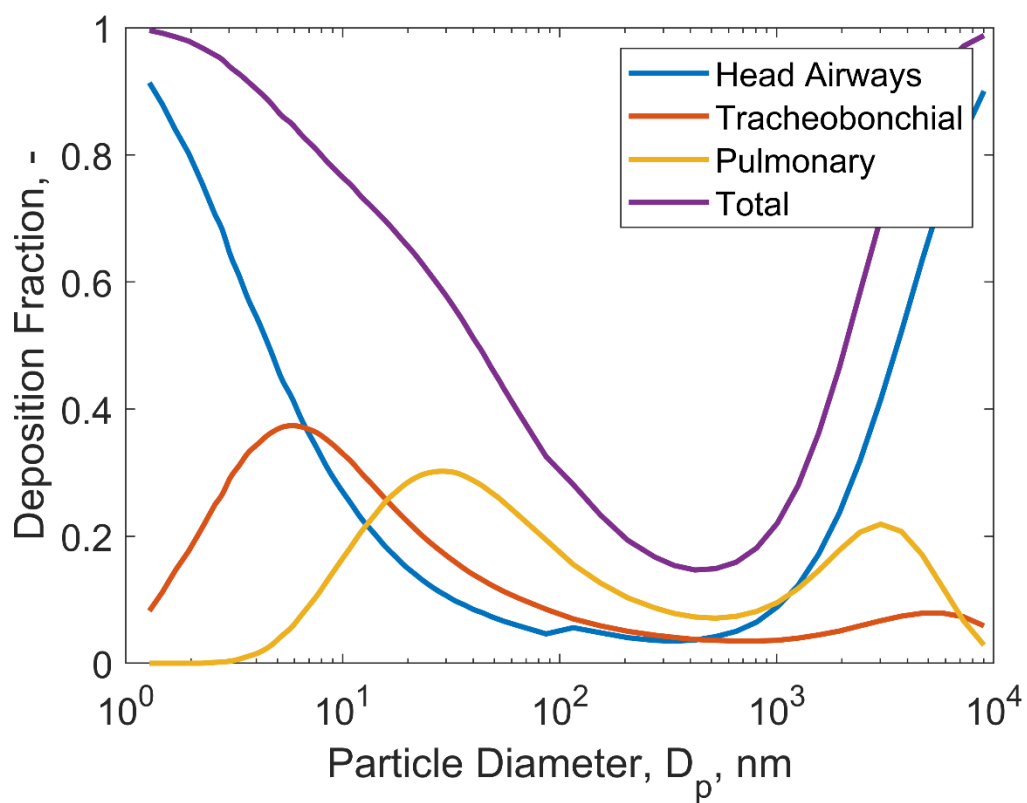

**Fig. S8. Size-resolved regional and total particle deposition fractions for the human respiratory tract.**

**Table S1. Abundance, fraction, and ozone reaction rate constant of select monoterpenes detected via GC-MS.**

| Monoterpene      | Abundance<br>(Absolute counts) | Relative<br>fraction | Second-order rate<br>constant ( $\text{ppb}^{-1} \text{hr}^{-1}$ ) | Reference |
|------------------|--------------------------------|----------------------|--------------------------------------------------------------------|-----------|
| d-limonene       | $1.1 \times 10^7$              | 0.44                 | $1.9 \times 10^{-2}$                                               | (10, 78)  |
| $\alpha$ -pinene | $2.5 \times 10^6$              | 0.10                 | $7.56 \times 10^{-3}$                                              | (78)      |
| $\beta$ -pinene  | $4.0 \times 10^6$              | 0.16                 | $1.32 \times 10^{-3}$                                              | (78)      |
| camphene         | $7.5 \times 10^6$              | 0.30                 | $7.94 \times 10^{-5}$                                              | (78)      |

**Table S2. List of gas-phase secondary oxidation products detected by PTR-ToF-MS and their molecular formula assignments.**

Compounds of the same molecular formula are grouped together and separated from other groups by a gray shading/border. “Label” column corresponds to the labeled structures in Figure S3 and S4, if shown. Only oxidation products from  $\alpha$ -pinene,  $\beta$ -pinene, and limonene are considered.

| Molecular Formula                      | Protonated mass | Common Name<br>(IUPAC name)                           | Reference | Structure                                                                             | Label |
|----------------------------------------|-----------------|-------------------------------------------------------|-----------|---------------------------------------------------------------------------------------|-------|
| $\text{C}_{10}\text{H}_{16}\text{O}_4$ | 201.163         | -                                                     | (77, 81)  | 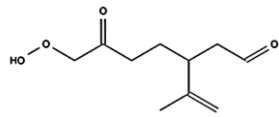 | 1A    |
|                                        |                 | 7-hydroxy-limononic acid                              | (82)      |  | 1B    |
|                                        |                 | 10-hydroxy-pinonic acid                               | (82)      |  | 1C    |
|                                        |                 |                                                       |           |                                                                                       |       |
| $\text{C}_{10}\text{H}_{16}\text{O}_3$ | 185.117221      | Limononic acid<br>(3-Isopropenyl-6-oxoheptanoic acid) | (4,82,83) |  | 2A    |

|                                                            |            |                                                                               |         |                                                                                       |    |
|------------------------------------------------------------|------------|-------------------------------------------------------------------------------|---------|---------------------------------------------------------------------------------------|----|
| C <sub>10</sub> H <sub>16</sub> O <sub>3</sub><br>(cont'd) | 185.117221 | 7OH-lim (7-hydroxylimononaldehyde)<br>(7-Hydroxy-3-isopropenyl-6-oxoheptanal) | (4,83)  | 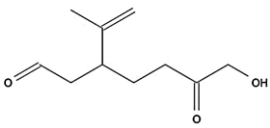   | 2B |
|                                                            |            | 4-Isopropenyl-1-methyl-1,5-dihydroxy-2-oxocyclohexane                         | (83)    |    | 2C |
|                                                            |            | -                                                                             | (77,81) |    | 2D |
|                                                            |            | Pinonic acid                                                                  | (82)    |  | 2E |
|                                                            |            | 10-hydroxy-pinonaldehyde                                                      | (82)    |  | 2F |
|                                                            |            |                                                                               |         |                                                                                       |    |
| C <sub>10</sub> H <sub>16</sub> O <sub>2</sub>             | 169.122306 | Limonaldehyde/<br>Limonaldehyde<br>(3-Isopropenyl-6-oxoheptanal)              | (4,82)  |  | 3A |

|                                                |            |                                                             |                 |                                                                                       |    |
|------------------------------------------------|------------|-------------------------------------------------------------|-----------------|---------------------------------------------------------------------------------------|----|
|                                                |            | Pinonaldehyde<br>(2,2-dimethyl-3-acetyl-cyclobutyl-ethanal) | (77,81)         |    | 3B |
|                                                |            |                                                             |                 |                                                                                       |    |
| C <sub>10</sub> H <sub>14</sub> O <sub>3</sub> | 183.19945  | (3-(2,3-Dioxobutyl)-4-methyl-4-pentalenol)                  | (77,81)         |    | 4A |
|                                                |            |                                                             |                 |                                                                                       |    |
| C <sub>9</sub> H <sub>14</sub> O <sub>5</sub>  | 203.091400 | -                                                           | (77,81)         |    | 4B |
|                                                |            | -                                                           | (77,81)         |   | 4C |
|                                                |            | 7-hydroxy-keto-limononic acid                               | (5, 77, 81, 82) |  | 4D |
|                                                |            |                                                             |                 |                                                                                       |    |
| C <sub>9</sub> H <sub>14</sub> O <sub>4</sub>  | 187.096485 | Limonic acid<br>(3-Isopropenylhexanedioic acid)             | (4, 5,82,83)    |  | 5A |
|                                                |            | Keto-limononic acid<br>(3-Acetyl-6-oxoheptanoic acid)       | (5,82,83)       |  | 5B |
|                                                |            | -                                                           | (77,81)         |  | 5C |

|                                               |            |                                                                         |                 |                                                                                       |    |
|-----------------------------------------------|------------|-------------------------------------------------------------------------|-----------------|---------------------------------------------------------------------------------------|----|
|                                               |            | 7-hydroxy-keto-limononaldehyde                                          | (77, 81,82)     | 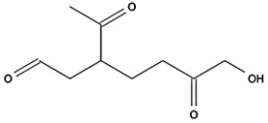   | 5D |
|                                               |            | Pinic acid                                                              | (82)            |    | 5E |
|                                               |            |                                                                         |                 |                                                                                       |    |
| C <sub>9</sub> H <sub>14</sub> O <sub>3</sub> | 171.101571 | Keto-limononaldehyde<br>(3-Acetyl-6-oxoheptanal)                        | (82,83)         |    | 6A |
|                                               |            | Limonic acid<br>( <i>(4R)</i> -5-Methyl-4-(2-oxoethyl)-5-hexenoic acid) | (4,5,77, 81-83) |   | 6B |
|                                               |            | Norlimononic acid                                                       | (5,82,83)       |  | 6C |
|                                               |            | Norpinonic acid                                                         | (82)            |  | 6D |
|                                               |            | Pinalic 3-acid                                                          | (82)            |  | 6E |
|                                               |            |                                                                         |                 |                                                                                       |    |

|                                               |            |                                                                  |                |                                                                                       |     |
|-----------------------------------------------|------------|------------------------------------------------------------------|----------------|---------------------------------------------------------------------------------------|-----|
| C <sub>9</sub> H <sub>14</sub> O              | 139.11581  | Keto-limonene/ Limonaketone<br>(4-Acetyl-1-methyl-1-cyclohexene) | (4,77, 81, 82) | 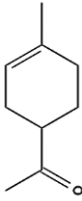   | 8A  |
|                                               |            | Pinaketone                                                       | (82)           |    | 8B  |
|                                               |            |                                                                  |                |                                                                                       |     |
| C <sub>8</sub> H <sub>14</sub> O <sub>4</sub> | 175.096485 | 3-isopropylpentanedioic acid                                     | (5)            |    | 9A  |
|                                               |            | -                                                                | (77,81)        |   | 9B  |
|                                               |            | -                                                                | (77,81)        |  | 9C  |
|                                               |            |                                                                  |                |                                                                                       |     |
| C <sub>8</sub> H <sub>12</sub> O <sub>5</sub> | 189.15803  | Keto-limonic acid (3-Acetylhexanedioic acid)                     | (5,77, 81, 82) |  | 11A |

|                                               |            |                     |         |                                                                                       |     |
|-----------------------------------------------|------------|---------------------|---------|---------------------------------------------------------------------------------------|-----|
|                                               |            | -                   | (77,81) | 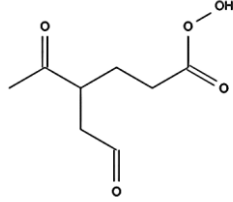   | 11B |
|                                               |            |                     |         |                                                                                       |     |
| C <sub>8</sub> H <sub>12</sub> O <sub>4</sub> | 173.080835 | Keto-limonalic acid | (5,82)  |    | 12A |
|                                               |            | Norlimonic acid     | (5,82)  |    | 12B |
|                                               |            | Norpinic acid       | (82)    |   | 12C |
|                                               |            |                     |         |                                                                                       |     |
| C <sub>8</sub> H <sub>12</sub> O <sub>3</sub> | 157.09     | -                   | (77,81) |  | 13A |
|                                               |            |                     |         |                                                                                       |     |
| C <sub>8</sub> H <sub>12</sub> O <sub>2</sub> | 141.145    | -                   | (77,81) |  | 14A |
|                                               |            |                     |         |                                                                                       |     |

|                                               |            |                                                    |          |                                                                                       |     |
|-----------------------------------------------|------------|----------------------------------------------------|----------|---------------------------------------------------------------------------------------|-----|
| C <sub>7</sub> H <sub>10</sub> O <sub>4</sub> | 159.065185 | 3,6-oxoheptanoic acid<br>(3,6-Dioxoheptanoic acid) | (5,83)   | 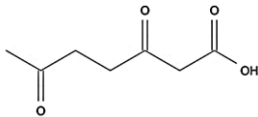   | 15A |
|                                               |            | 4,6-oxoheptanoic acid                              | (5)      |    | 15B |
|                                               |            | (4-Formyl-5-oxohexanoic acid)                      | (77, 81) |    | 15C |
|                                               |            | (4-Oxo-3-(2-oxoethyl)pentanoic acid)               | (77, 81) |   | 15D |
|                                               |            |                                                    |          |                                                                                       |     |
| C <sub>7</sub> H <sub>10</sub> O <sub>3</sub> | 143.135    | -                                                  | (77, 81) |  | 16A |
|                                               |            | -                                                  | (77, 81) |  | 16B |
|                                               |            |                                                    |          |                                                                                       |     |



|             |           |               |      |                                                                                     |    |
|-------------|-----------|---------------|------|-------------------------------------------------------------------------------------|----|
| $C_2H_4O_3$ | 77.023320 | Glycolic acid | (77) | 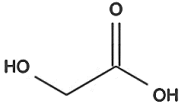 | 17 |
|-------------|-----------|---------------|------|-------------------------------------------------------------------------------------|----|

## REFERENCES AND NOTES

1. T. Wu, B. E. Boor, Urban aerosol size distributions: A global perspective. *Atmos. Chem. Phys.* **21**, 8883–8914 (2021).
2. L. Wallace, Indoor sources of ultrafine and accumulation mode particles: Size distributions, size-resolved concentrations, and source strengths. *Aerosol Sci. Technol.* **40**, 348–360 (2006).
3. R. K. Pathak, K. Salo, E. U. Emanuelsson, C. Cai, A. Lutz, Å. M. Hallquist, M. Hallquist, Influence of ozone and radical chemistry on limonene organic aerosol production and thermal characteristics. *Environ. Sci. Technol.* **46**, 11660–11669 (2012).
4. S. Leungsakul, M. Jaoui, R. M. Kamens, Kinetic mechanism for predicting secondary organic aerosol formation from the reaction of d-limonene with ozone. *Environ. Sci. Technol.* **39**, 9583–9594 (2005).
5. J. Hammes, A. Lutz, T. Mentel, C. Faxon, M. Hallquist, Carboxylic acids from limonene oxidation by ozone and hydroxyl radicals: Insights into mechanisms derived using a FIGAERO-CIMS. *Atmos. Chem. Phys.* **19**, 13037–13052 (2019).
6. T. Wu, M. Täubel, R. Holopainen, A. K. Viitanen, S. Vainiotalo, T. Tuomi, J. Keskinen, A. Hyvärinen, K. Hämeri, S. E. Saari, B. E. Boor, Infant and adult inhalation exposure to resuspended biological particulate matter. *Environ. Sci. Technol.* **52**, 237–247 (2018).
7. S. Rossignol, C. Rio, A. Ustache, S. Fable, J. Nicolle, A. Mème, B. D'Anna, M. Nicolas, E. Leoz, L. Chiappini, The use of a housecleaning product in an indoor environment leading to oxygenated polar compounds and SOA formation: Gas and particulate phase chemical characterization. *Atmos. Environ.* **75**, 196–205 (2013).
8. S. Youssefi, M. S. Waring, Transient secondary organic aerosol formation from limonene ozonolysis in indoor environments: Impacts of air exchange rates and initial concentration ratios. *Environ. Sci. Technol.* **48**, 7899–7908 (2014).
9. X. Niu, S. S. H. Ho, K. F. Ho, Y. Huang, J. Cao, Z. Shen, J. Sun, X. Wang, Y. Wang, S. Lee, R. Huang, Indoor secondary organic aerosols formation from ozonolysis of monoterpene: An example of d-limonene with ammonia and potential impacts on pulmonary inflammations. *Sci. Total Environ.* **579**, 212–220 (2017).
10. M. S. Waring, Secondary organic aerosol formation by limonene ozonolysis: Parameterizing multi-generational chemistry in ozone- and residence time-limited indoor environments. *Atmos. Environ.* **144**, 79–86 (2016).
11. B. C. Singer, B. K. Coleman, H. Destailats, A. T. Hodgson, M. M. Lunden, C. J. Weschler, W. W. Nazaroff, Indoor secondary pollutants from cleaning product and air freshener use in the presence of ozone. *Atmos. Environ.* **40**, 6696–6710 (2006).
12. S. Langer, J. Moldanová, K. Arrhenius, E. Ljungström, L. Ekberg, Ultrafine particles produced by ozone/limonene reactions in indoor air under low/closed ventilation conditions. *Atmos. Environ.* **42**, 4149–4159 (2008).

13. L. Morawska, C. He, G. Johnson, H. Guo, E. Uhde, G. Ayoko, Ultrafine particles in indoor air of a school: Possible role of secondary organic aerosols. *Environ. Sci. Technol.* **43**, 9103–9109 (2009).
14. E. Vartiainen, M. Kulmala, T. M. Ruuskanen, R. Taipale, J. Rinne, H. Vehkamäki, Formation and growth of indoor air aerosol particles as a result of d-limonene oxidation. *Atmos. Environ.* **40**, 7882–7892 (2006).
15. T. Wainman, J. Zhang, C. J. Weschler, P. J. Lioy, Ozone and limonene in indoor air: A source of submicron particle exposure. *Environ. Health Perspect.* **108**, 1139–1145 (2000).
16. C. J. Weschler, H. C. Shields, Indoor ozone/terpene reactions as a source of indoor particles. *Atmos. Environ.* **33**, 2301–2312 (1999).
17. C. Rosch, D. K. Wissenbach, U. Franck, M. Wendisch, U. Schlink, Degradation of indoor limonene by outdoor ozone: A cascade of secondary organic aerosols. *Environ. Pollut.* **226**, 463–472 (2017).
18. N. Carslaw, A mechanistic study of limonene oxidation products and pathways following cleaning activities. *Atmos. Environ.* **80**, 507–513 (2013).
19. M. S. Waring, J. R. Wells, Volatile organic compound conversion by ozone, hydroxyl radicals, and nitrate radicals in residential indoor air: Magnitudes and impacts of oxidant sources. *Atmos. Environ.* **106**, 382–391 (2015).
20. R. Ciriminna, M. Lomeli-Rodriguez, P. Demma Cara, J. A. Lopez-Sanchez, M. Pagliaro, Limonene: A versatile chemical of the bioeconomy. *Chem. Commun. (Camb.)* **50**, 15288–15296 (2014).
21. S. K. Brown, M. R. Sim, M. J. Abramson, C. N. Gray, Concentrations of volatile organic compounds in indoor air—A review. *Indoor Air* **4**, 123–134 (1994).
22. U.S. Environmental Protection Agency, *Indoor Air Quality: Volatile Organic Compounds' Impact on Indoor Air Quality* (U.S. Environmental Protection Agency, 2020).
23. C. Wang, D. B. Collins, J. P. D. Abbatt, Indoor illumination of terpenes and bleach emissions leads to particle formation and growth. *Environ. Sci. Technol.* **53**, 11792–11800 (2019).
24. A. Wisthaler, C. J. Weschler, Reactions of ozone with human skin lipids: Sources of carbonyls, dicarbonyls, and hydroxycarbonyls in indoor air. *Proc. Natl. Acad. Sci. U.S.A.* **107**, 6568–6575 (2010).
25. H. Wang, G. C. Morrison, Ozone-initiated secondary emission rates of aldehydes from indoor surfaces in four homes. *Environ. Sci. Technol.* **40**, 5263–5268 (2006).
26. D. Lai, P. Karava, Q. Chen, Study of outdoor ozone penetration into buildings through ventilation and infiltration. *Build. Environ.* **93**, 112–118 (2015).

27. D. Pagonis, L. B. Algrim, D. J. Price, D. A. Day, A. V. Handschy, H. Stark, S. L. Miller, J. A. de Gouw, J. L. Jimenez, P. J. Ziemann, Autoxidation of limonene emitted in a university art museum. *Environ. Sci. Technol. Lett.* **6**, 520–524 (2019).
28. N. Carslaw, L. Fletcher, D. Heard, T. Ingham, H. Walker, Significant OH production under surface cleaning and air cleaning conditions: Impact on indoor air quality. *Indoor Air* **27**, 1091–1100 (2017).
29. M. Mendez, D. Amedro, N. Blond, D. A. Hauglustaine, P. Blondeau, C. Afif, C. Fittschen, C. Schoemaeker, Identification of the major HO<sub>x</sub> radical pathways in an indoor air environment. *Indoor Air* **27**, 434–442 (2017).
30. E. Gomez Alvarez, D. Amedro, C. Afif, S. Gligorovski, C. Schoemaeker, C. Fittschen, J. F. Doussin, H. Wortham, Unexpectedly high indoor hydroxyl radical concentrations associated with nitrous acid. *Proc. Natl. Acad. Sci.* **110**, 13294–13299 (2013).
31. S. D. Maleknia, T. L. Bell, M. A. Adams, PTR-MS analysis of reference and plant-emitted volatile organic compounds. *Int. J. Mass Spectrom.* **262**, 203–210 (2007).
32. J. Jiang, X. Ding, A. Tasoglou, H. Huber, A. D. Shah, N. Jung, B. E. Boor, Real-time measurements of botanical disinfectant emissions, transformations, and multiphase inhalation exposures in buildings. *Environ. Sci. Technol. Lett.* **8**, 558–566 (2021).
33. D. K. Farmer, M. E. Vance, J. P. D. Abbatt, A. Abeleira, M. R. Alves, C. Arata, E. Boedicker, S. Bourne, F. Cardoso-Saldaña, R. Corsi, P. F. DeCarlo, A. H. Goldstein, V. H. Grassian, L. Hildebrandt Ruiz, J. L. Jimenez, T. F. Kahan, E. F. Katz, J. M. Mattila, W. W. Nazaroff, A. Novoselac, R. E. O'Brien, V. W. Or, S. Patel, S. Sankhyan, P. S. Stevens, Y. Tian, M. Wade, C. Wang, S. Zhou, Y. Zhou, Overview of HOMEChem: House observations of microbial and environmental chemistry. *Environ Sci Process Impacts* **21**, 1280–1300 (2019).
34. X. Tang, P. K. Misztal, W. W. Nazaroff, A. H. Goldstein, Volatile organic compound emissions from humans indoors. *Environ. Sci. Technol.* **50**, 12686–12694 (2016).
35. M. M. Lew, P. S. Rickly, B. P. Bottorff, E. Reidy, S. Sklaveniti, T. Léonardis, N. Locoge, S. Dusanter, S. Kundu, E. Wood, P. S. Stevens, OH and HO<sub>2</sub> radical chemistry in a midlatitude forest: Measurements and model comparisons. *Atmos. Chem. Phys.* **20**, 9209–9230 (2020).
36. E. Ioannou, A. Koutsaviti, O. Tzakou, V. Roussis, The genus Pinus: A comparative study on the needle essential oil composition of 46 pine species. *Phytochem. Rev.* **13**, 741–768 (2014).
37. S. Kundu, B. L. Deming, M. M. Lew, B. P. Bottorff, P. Rickly, P. S. Stevens, S. Dusanter, S. Sklaveniti, T. Leonardis, N. Locoge, E. C. Wood, Peroxy radical measurements by ethane – nitric oxide chemical amplification and laser-induced fluorescence during the IRRONIC field campaign in a forest in Indiana. *Atmos. Chem. Phys.* **19**, 9563–9579 (2019).
38. J. Kontkanen, E. Järvinen, H. E. Manninen, K. Lehtipalo, J. Kangasluoma, S. Decesari, G. P. Gobbi, A. Laaksonen, T. Petäjä, M. Kulmala, High concentrations of sub-3nm clusters and

frequent new particle formation observed in the Po Valley, Italy, during the PEGASOS 2012 campaign. *Atmos. Chem. Phys.* **16**, 1919–1935 (2016).

39. M. Kulmala, H. Vehkamäki, T. Petäjä, M. Dal Maso, A. Lauri, V. M. Kerminen, W. Birmili, P. H. McMurry, Formation and growth rates of ultrafine atmospheric particles: A review of observations. *J. Aerosol Sci.* **35**, 143–176 (2004).
40. Y. Zhu, W. C. Hinds, S. Kim, S. Shen, C. Sioutas, Study of ultrafine particles near a major highway with heavy-duty diesel traffic. *Atmos. Environ.* **36**, 4323–4335 (2002).
41. S. Yang, D. Licina, C. J. Weschler, N. Wang, N. Zannoni, M. Li, J. Vanhanen, S. Langer, P. Wargocki, J. Williams, G. Bekö, Ozone initiates human-derived emission of nanocluster aerosols. *Environ. Sci. Technol.* **55**, 14536–14545 (2021).
42. R. K. Pathak, C. O. Stanier, N. M. Donahue, S. N. Pandis, Ozonolysis of  $\alpha$ -pinene at atmospherically relevant concentrations: Temperature dependence of aerosol mass fractions (yields). *J. Geophys. Res.* **112**, D03201 (2007).
43. R. Reichman, E. Shirazi, D. G. Colliver, K. G. Pennell, US residential building air exchange rates: New perspectives to improve decision making at vapor intrusion sites. *Environ Sci Process Impacts* **19**, 87–100 (2017).
44. N. C. Bouvier-Brown, A. H. Goldstein, J. B. Gilman, W. C. Kuster, J. A. de Gouw, In-situ ambient quantification of monoterpenes, sesquiterpenes, and related oxygenated compounds during BEARPEX 2007: Implications for gas- and particle-phase chemistry. *Atmos. Chem. Phys.* **9**, 5505–5518 (2009).
45. A. U. Raysoni, T. H. Stock, J. A. Sarnat, M. C. Chavez, S. E. Sarnat, T. Montoya, F. Holguin, W. W. Li, Evaluation of VOC concentrations in indoor and outdoor microenvironments at near-road schools. *Environ. Pollut.* **231**, 681–693 (2017).
46. B. Stephens, J. A. Siegel, Ultrafine particle removal by residential heating, ventilating, and air-conditioning filters. *Indoor Air* **23**, 488–497 (2013).
47. J. Kirkby, J. Duplissy, K. Sengupta, C. Frege, H. Gordon, C. Williamson, M. Heinritzi, M. Simon, C. Yan, J. Almeida, J. Tröstl, T. Nieminen, I. K. Ortega, R. Wagner, A. Adamov, A. Amorim, A. K. Bernhammer, F. Bianchi, M. Breitenlechner, S. Brilke, X. Chen, J. Craven, A. Dias, S. Ehrhart, R. C. Flagan, A. Franchin, C. Fuchs, R. Guida, J. Hakala, C. R. Hoyle, T. Jokinen, H. Junninen, J. Kangasluoma, J. Kim, M. Krapf, A. Kürten, A. Laaksonen, K. Lehtipalo, V. Makhmutov, S. Mathot, U. Molteni, A. Onnela, O. Peräkylä, F. Piel, T. Petäjä, A. P. Praplan, K. Pringle, A. Rap, N. A. D. Richards, I. Riipinen, M. P. Rissanen, L. Rondo, N. Sarnela, S. Schobesberger, C. E. Scott, J. H. Seinfeld, M. Sipilä, G. Steiner, Y. Stozhkov, F. Stratmann, A. Tomé, A. Virtanen, A. L. Vogel, A. C. Wagner, P. E. Wagner, E. Weingartner, D. Wimmer, P. M. Winkler, P. Ye, X. Zhang, A. Hansel, J. Dommen, N. M. Donahue, D. R. Worsnop, U. Baltensperger, M. Kulmala, K. S. Carslaw, J. Curtius, Ion-induced nucleation of pure biogenic particles. *Nature* **533**, 521–526 (2016).

48. J. Tröstl, W. K. Chuang, H. Gordon, M. Heinritzi, C. Yan, U. Molteni, L. Ahlm, C. Frege, F. Bianchi, R. Wagner, M. Simon, K. Lehtipalo, C. Williamson, J. S. Craven, J. Duplissy, A. Adamov, J. Almeida, A. K. Bernhammer, M. Breitenlechner, S. Brilke, A. Dias, S. Ehrhart, R. C. Flagan, A. Franchin, C. Fuchs, R. Guida, M. Gysel, A. Hansel, C. R. Hoyle, T. Jokinen, H. Junninen, J. Kangasluoma, H. Keskinen, J. Kim, M. Krapf, A. Kürten, A. Laaksonen, M. Lawler, M. Leiminger, S. Mathot, O. Möhler, T. Nieminen, A. Onnela, T. Petäjä, F. M. Piel, P. Miettinen, M. P. Rissanen, L. Rondo, N. Sarnela, S. Schobesberger, K. Sengupta, M. Sipilä, J. N. Smith, G. Steiner, A. Tomè, A. Virtanen, A. C. Wagner, E. Weingartner, D. Wimmer, P. M. Winkler, P. Ye, K. S. Carslaw, J. Curtius, J. Dommen, J. Kirkby, M. Kulmala, I. Riipinen, D. R. Worsnop, N. M. Donahue, U. Baltensperger, The role of low-volatility organic compounds in initial particle growth in the atmosphere. *Nature* **533**, 527–531 (2016).
49. S. Patel, D. Rim, S. Sankhyan, A. Novoselac, M. E. Vance, Aerosol dynamics modeling of sub-500 nm particles during the HOMEChem study. *Environ. Sci. Process. Impacts* **23**, 1706–1717 (2021).
50. R. Cai, D. Yang, Y. Fu, X. Wang, X. Li, Y. Ma, J. Hao, J. Zheng, J. Jiang, Aerosol surface area concentration: A governing factor in new particle formation in Beijing. *Atmos. Chem. Phys.* **17**, 12327–12340 (2017).
51. G. M. Wolfe, M. R. Marvin, S. J. Roberts, K. R. Travis, J. Liao, The Framework for 0-D Atmospheric Modeling (F0AM) v3.1. *Geosci. Model Dev.* **9**, 3309–3319 (2016).
52. J. Chen, K. H. Møller, P. O. Wennberg, H. G. Kjaergaard, Unimolecular reactions following indoor and outdoor limonene ozonolysis. *Chem. Eur. J.* **125**, 669–680 (2021).
53. M. Li, C. J. Weschler, G. Bekö, P. Wargocki, G. Lucic, J. Williams, Human ammonia emission rates under various indoor environmental conditions. *Environ. Sci. Technol.* **54**, 5419–5428 (2020).
54. J. Kirkby, J. Curtius, J. Almeida, E. Dunne, J. Duplissy, S. Ehrhart, A. Franchin, S. Gagné, L. Ickes, A. Kürten, A. Kupc, A. Metzger, F. Riccobono, L. Rondo, S. Schobesberger, G. Tsagkogeorgas, D. Wimmer, A. Amorim, F. Bianchi, M. Breitenlechner, A. David, J. Dommen, A. Downard, M. Ehn, R. C. Flagan, S. Haider, A. Hansel, D. Hauser, W. Jud, H. Junninen, F. Kreissl, A. Kvashin, A. Laaksonen, K. Lehtipalo, J. Lima, E. R. Lovejoy, V. Makhmutov, S. Mathot, J. Mikkilä, P. Minginette, S. Mogo, T. Nieminen, A. Onnela, P. Pereira, T. Petäjä, R. Schnitzhofer, J. H. Seinfeld, M. Sipilä, Y. Stozhkov, F. Stratmann, A. Tomé, J. Vanhanen, Y. Viisanen, A. Vrtala, P. E. Wagner, H. Walther, E. Weingartner, H. Wex, P. M. Winkler, K. S. Carslaw, D. R. Worsnop, U. Baltensperger, M. Kulmala, Role of sulphuric acid, ammonia and galactic cosmic rays in atmospheric aerosol nucleation. *Nature* **476**, 429–433 (2011).
55. S. L. Sihto, M. Kulmala, V. M. Kerminen, M. Dal Maso, T. Petäjä, I. Riipinen, H. Korhonen, F. Arnold, R. Janson, M. Boy, A. Laaksonen, K. E. J. Lehtinen, Atmospheric sulphuric acid

and aerosol formation: Implications from atmospheric measurements for nucleation and early growth mechanisms. *Atmos. Chem. Phys.* **6**, 4079–4091 (2006).

56. K. Lehtipalo, C. Yan, L. Dada, F. Bianchi, M. Xiao, R. Wagner, D. Stolzenburg, L. R. Ahonen, A. Amorim, A. Baccharini, P. S. Bauer, B. Baumgartner, A. Bergen, A.-K. Bernhammer, M. Breitenlechner, S. Brilke, A. Buchholz, S. B. Mazon, D. Chen, X. Chen, A. Dias, J. Dommen, D. C. Draper, J. Duplissy, M. Ehn, H. Finkenzeller, L. Fischer, C. Frege, C. Fuchs, O. Garmash, H. Gordon, J. Hakala, X. He, L. Heikkinen, M. Heinritzi, J. C. Helm, V. Hofbauer, C. R. Hoyle, T. Jokinen, J. Kangasluoma, V.-M. Kerminen, C. Kim, J. Kirkby, J. Kontkanen, A. Kürten, M. J. Lawler, H. Mai, S. Mathot, R. L. Mauldin III, U. Molteni, L. Nichman, W. Nie, T. Nieminen, A. Ojdanic, A. Onnela, M. Passananti, T. Petäjä, F. Piel, V. Pospisilova, L. L. J. Quéléver, M. P. Rissanen, C. Rose, N. Sarnela, S. Schallhart, S. Schuchmann, K. Sengupta, M. Simon, M. Sipilä, C. Tauber, A. Tomé, J. Tröstl, O. Väisänen, A. L. Vogel, R. Volkamer, A. C. Wagner, M. Wang, L. Weitz, D. Wimmer, P. Ye, A. Ylisirniö, Q. Zha, K. S. Carslaw, J. Curtius, N. M. Donahue, R. C. Flagan, A. Hansel, I. Riipinen, A. Virtanen, P. M. Winkler, U. Baltensperger, M. Kulmala, D. R. Worsnop, Multicomponent new particle formation from sulfuric acid, ammonia, and biogenic vapors. *Sci. Adv.* **4**, eaau5363 (2018).
57. T. Hussein, B. E. Boor, J. Löndahl, Regional inhaled deposited dose of indoor combustion-generated aerosols in Jordanian urban homes. *Atmosphere* **11**, 1150 (2020).
58. T. Rönkkö, H. Kuuluvainen, P. Karjalainen, J. Keskinen, R. Hillamo, J. V. Niemi, L. Pirjola, H. J. Timonen, S. Saarikoski, E. Saukko, A. Järvinen, H. Silvennoinen, A. Rostedt, M. Olin, J. Yli-Ojanperä, P. Nousiainen, A. Kousa, M. Dal Maso, Traffic is a major source of atmospheric nanocluster aerosol. *Proc. Natl. Acad. Sci.* **114**, 7549–7554 (2017).
59. S. Patel, S. Sankhyan, E. K. Boedicker, P. F. DeCarlo, D. K. Farmer, A. H. Goldstein, E. F. Katz, W. W. Nazaroff, Y. Tian, J. Vanhanen, M. E. Vance, Indoor particulate matter during HOMEChem: Concentrations, size distributions, and exposures. *Environ. Sci. Technol.* **54**, 7107–7116 (2020).
60. L. A. Sgro, A. Simonelli, L. Pascarella, P. Minutolo, D. Guarnieri, N. Sannolo, P. Netti, A. D'Anna, Toxicological properties of nanoparticles of organic compounds (NOC) from flames and vehicle exhausts. *Environ. Sci. Technol.* **43**, 2608–2613 (2009).
61. L. Malorni, V. Guida, M. Sirignano, G. Genovese, C. Petrarca, P. Pedata, Exposure to sub-10 nm particles emitted from a biodiesel-fueled diesel engine: In vitro toxicity and inflammatory potential. *Toxicol. Lett.* **270**, 51–61 (2017).
62. P. Pedata, N. Bergamasco, A. D'Anna, P. Minutolo, L. Servillo, N. Sannolo, M. L. Balestrieri, Apoptotic and proinflammatory effect of combustion-generated organic nanoparticles in endothelial cells. *Toxicol. Lett.* **219**, 307–314 (2013).
63. G. J. Garcia, J. D. Schroeter, J. S. Kimbell, Olfactory deposition of inhaled nanoparticles in humans. *Inhal. Toxicol.* **27**, 394–403 (2015).

64. R. W. Baldauf, R. B. Devlin, P. Gehr, R. Giannelli, B. Hassett-Sipple, H. Jung, G. Martini, J. M. Donald, J. D. Sacks, K. Walker, Ultrafine particle metrics and research considerations: Review of the 2015 UFP workshop. *Int. J. Environ. Res. Public Health* **13**, 1054 (2016).
65. U.S. Department of Labor Bureau of Labor Statistics, Janitors and building cleaners, in *Occupational Outlook Handbook* (U.S. Bureau of Labor Statistics, 2021).
66. N. K. Rai, A. Ashok, B. R. Akondi, Consequences of chemical impact of disinfectants: Safe preventive measures against COVID-19. *Crit. Rev. Toxicol.* **50**, 513–520 (2020).
67. L. Morawska, J. W. Tang, W. Bahnfleth, P. M. Bluyssen, A. Boerstra, G. Buonanno, J. Cao, S. Dancer, A. Floto, F. Franchimon, C. Haworth, J. Hogeling, C. Isaxon, J. L. Jimenez, J. Kurnitski, Y. Li, M. Loomans, G. Marks, L. C. Marr, L. Mazzearella, A. K. Melikov, S. Miller, D. K. Milton, W. Nazaroff, P. V. Nielsen, C. Noakes, J. Peccia, X. Querol, C. Sekhar, O. Seppänen, S. I. Tanabe, R. Tellier, K. W. Tham, P. Wargocki, A. Wierzbicka, M. Yao, How can airborne transmission of COVID-19 indoors be minimised? *Environ. Int.* **142**, 105832 (2020).
68. H. Fuchs, F. Holland, A. Hofzumahaus, Measurement of tropospheric RO<sub>2</sub> and HO<sub>2</sub> radicals by a laser-induced fluorescence instrument. *Rev. Sci. Instrum.* **79**, 084104 (2008).
69. J. Vanhanen, J. Mikkilä, K. Lehtipalo, M. Sipilä, H. E. Manninen, E. Siivola, T. Petäjä, M. Kulmala, Particle size magnifier for nano-CN detection. *Aerosol Sci. Technol.* **45**, 533–542 (2011).
70. R. Cai, D. Yang, L. R. Ahonen, L. Shi, F. Korhonen, Y. Ma, J. Hao, T. Petäjä, J. Zheng, J. Kangasluoma, J. Jiang, Data inversion methods to determine sub-3 nm aerosol size distributions using the particle size magnifier. *Atmos. Meas. Tech.* **11**, 4477–4491 (2018).
71. J. E. Brockmann, Aerosol transport in sampling lines and inlets, in *Aerosol Measurement: Principles, Techniques, and Applications*, P. Kulkarni, P. A. Baron, K. Willeke, Eds. (Wiley, 2011), pp. 69–105.
72. H. Saathoff, K. H. Naumann, O. Möhler, Å. M. Jonsson, M. Hallquist, A. Kiendler-Scharr, T. F. Mentel, R. Tillmann, U. Schurath, Temperature dependence of yields of secondary organic aerosols from the ozonolysis of  $\alpha$ -pinene and limonene. *Atmos. Chem. Phys.* **9**, 1551–1577 (2009).
73. V. Marple, B. Olson, F. Romay, G. Hudak, S. M. Geerts, D. Lundgren, Second generation micro-orifice uniform deposit impactor, 120 MOUDI-II: Design, evaluation, and application to long-term ambient sampling. *Aerosol Sci. Technol.* **48**, 427–433 (2014).
74. A. Tani, S. Hayward, C. N. Hewitt, Measurement of monoterpenes and related compounds by proton transfer reaction-mass spectrometry (PTR-MS). *Int. J. Mass Spectrom.* **223-224**, 561–578 (2003).
75. A. Tani, Fragmentation and reaction rate constants of terpenoids determined by proton transfer reaction-mass spectrometry. *Environ. Control. Biol.* **51**, 23–29 (2013).



76. J. Zhao, R. Zhang, Proton transfer reaction rate constants between hydronium ion (H<sub>3</sub>O<sup>+</sup>) and volatile organic compounds. *Atmos. Environ.* **38**, 2177–2185 (2004).
77. S. M. Saunders, M. E. Jenkin, R. G. Derwent, M. J. Pilling, Protocol for the development of the Master Chemical Mechanism, MCM v3 (Part A): Tropospheric degradation of non-aromatic volatile organic compounds. *Atmos. Chem. Phys.* **3**, 161–180 (2003).
78. R. Atkinson, D. Hasegawa, S. M. Aschmann, Rate constants for the gas-phase reactions of O<sub>3</sub> with a series of monoterpenes and related compounds at 296 ± 2 K. *Int. J. Chem. Kinet.* **22**, 871–887 (1990).
79. J. Liggió, S.-M. Li, Reactive uptake of pinonaldehyde on acidic aerosols. *J. Geophys. Res.* **111**, (2006).
80. U.S. Environmental Protection Agency, “Exposure Factors Handbook: 2011 Edition (Final Report)” (EPA/600/R-09/052F, U.S. Environmental Protection Agency, 2011).
81. M. E. Jenkin, K. P. Wyche, C. J. Evans, T. Carr, P. S. Monks, M. R. Alfarra, M. H. Barley, G. B. McFiggans, J. C. Young, A. R. Rickard, Development and chamber evaluation of the MCM v3.2 degradation scheme for β-caryophyllene. *Atmos. Chem. Phys.* **12**, 5275–5308 (2012).
82. M. Glasius, M. Lahaniati, A. Calogirou, D. di Bella, N. R. Jensen, J. Hjorth, D. Kotzias, B. R. Larsen, Carboxylic acids in secondary aerosols from oxidation of cyclic monoterpenes by ozone. *Environ. Sci. Technol.* **34**, 1001–1010 (2000).
83. G. I. Gkatzelis, T. Hohaus, R. Tillmann, I. Gensch, M. Müller, P. Eichler, K. M. Xu, P. Schlag, S. H. Schmitt, Z. Yu, R. Wegener, M. Kaminski, R. Holzinger, A. Wisthaler, A. Kiendler-Scharr, Gas-to-particle partitioning of major biogenic oxidation products: A study on freshly formed and aged biogenic SOA. *Atmos. Chem. Phys.* **18**, 12969–12989 (2018).
